# Supplementary material for: The Metabolic Footprint on Right Ventricular Function: A Prospective Observational Study
Source: Research Square preprint supplement (doi:10.21203/rs.3.rs-7742838/v1), 2025-10-20
Supplement: Supplementary file 1 [file a943845ce6dea50ac4bd8df3.xlsx]

## Sheet: DM
	PERSONAL DETAILS								DIAGNOSIS		VITALS		BLOOD PARAMETERS			ECHO PARAMETERS
S.NO	PATIENT NAME	AGE	SEX	ID.NO	HEIGHT (CM)	WEIGHT(KG)	BSA	BMI	DM	HTN	SBP	DBP	HBA1C	HDL	LDL	LVEDD (MM)	LVESD (MM)	IVDT	IVST	PWDT	PWST	EDV (ML)	ESV (ML)	LV EF(%)	E (M/S)	A (M/S)	E/A (M/S)	DT (M/S)	E' (M/S)	E/E' (M/S)	RV DIMENSION		RV THICKNESS (MM)	RV DIASTOLIC AREA	RV SYSTOLIC AREA	RV FAC (%)	TAPSE (CM)	RV S' M/S	E(T)	A(T)	E/A (T)	DT (T)	E'(T)	A' (T)	E/E' (T)	TRPG	IVC (SIZE/COLLAPSIBILITY)	PAP	IVRT (MS)
1	MR LAVA SUNDAR BABU S V	47	M	914387	170	76	1.91045	26.2976	4	NIL	100	60	7.5	45	72	46	31	9	10	10	11	89	32	64	0.8	0.5	1.47	145	0.1	8.71	33	28	4	17.4	9.8	43.6782	1.8	0.1	0.5	0.3	1.49	115	0.1	0.11	5.35	19	1.0CM/COLLAPSING	22	82
2	MR SELVA KUMAR	38	M	2983157	171	93.5	2.13069	31.9757	3M	NIL	130	80	8	31	96	42	27	11	12	12	13	96	35	63	0.9	0.7	1.37	103	0.1	9.95	34	26	5	16.7	8.7	47.9042	2	0.13	0.4	0.3	1.39	182	0.13	0.16	3.48	27	1.1CM/COLLAPSING	30	68
3	MR MOHANDOSS GURUSAMY	67	M	2405282	169	67	1.78602	23.4586	12	NIL	130	80	7.3	39	90	44	28	12	12	11	13	75	29	62	0.7	0.6	1.07	165	0.06	12.82	33	25	6	12.2	8.5	30.3279	1.8	0.1	0.4	0.3	1.06	180	0.09	0.13	4.61	14	1.2CM/COLLAPSING	17	63
4	MR SANKARANARAYANAN G	48	M	2487857	174	70	1.84937	23.1206	6	NIL	120	70	13.9	21	92	47	31	10	11	9	10	106	39	64	0.8	0.8	0.94	133	0.07	11.31	28	19	6	15.5	8.1	47.7419	1.9	0.13	1	0.8	1.27	209	0.11	0.12	8.99	18	1.3CM/COLLAPSING	21	54
5	MR SELVIN EBENEZER	45	M	3060078	172	111.4	2.33741	37.6555	1.5	NIL	130	80	6.3	45	130	48	31	11	12	10	11	87	33	62	1	0.7	1.41	162	0.11	9.13	35	25	3	18.2	9.3	48.9011	2.3	0.13	0.6	0.7	0.85	279	0.13	0.15	4.96	10	1.2CM, COLLAPSING	13	75
6	MR JEGANATHAN	40	M	2066040	172	80.7	1.98011	27.2783	PRE DM	NIL	120	80	6.2	41	205	45	30	8	10	10	11	84	26	70	0.8	0.5	1.53	144	0.1	8.66	30	26	4	15.6	9.1	41.6667	2.1	0.09	0.3	0.2	1.39	247	0.1	0.09	3.74	13	1.0CM/COLLAPSING	16	73
7	MR DIPANKAR DEY	33	M	3059533	166	76.4	1.89644	27.7254	2	NIL	120	80	6.8	40	134	40	27	10	11	9	10	61	19	69	0.7	0.4	1.48	194	0.1	6.97	33	28	4	16.4	9.7	40.8537	1.8	0.1	0.5	0.3	1.41	283	0.1	0.08	5.07	13	1.0CM/COLLAPSING	16	58
8	MR MUTHUSAMY	60	M	2807868	161	64.2	1.71178	24.7676	2	NIL	130	80	6.2	40	175	46	31	11	13	12	13	83	32	61	0.7	0.8	0.91	175	0.06	12.65	30	24	6	12.6	6.5	48.4127	2	0.13	0.4	0.3	1.39	284	0.08	0.12	5.2	32	1.0CM/COLLAPSING	35	67
9	MR BABU	56	M	2667589	174	88.4	2.08534	29.198	ND	NIL	120	80	6	47	107	47	31	8	10	8	10	103	34	67	0.7	0.6	1.11	184	0.07	10.94	32	25	4	14.1	7.8	44.6809	2	0.14	1	0.7	1.46	273	0.17	0.14	6.11	19	1.3CM/COLLAPSING	22	69
10	MRS ALAMELU AMMAL M	69	F	3068577	148	63.4	1.64134	28.9445	4	NIL	110	70	6	53	123	48	31	9	10	9	10	47	16	66	0.8	1	0.85	184	0.07	11.72	28	24	6	14	6.3	55	2.2	0.11	0.5	0.4	1.08	267	0.07	0.14	7.61	19	0.9CM/COLLAPSING	22	66
11	MR VISHNU	26	M	21895010	160	52	1.53182	20.3125	ND	NIL	110	70	6.5	12	52	43	28	7	8	8	9	85	32	62	0.7	0.6	1.12	125	0.12	5.93	28	26	3	14.5	7.8	46.2069	2	0.14	0.8	0.9	0.98	196	0.15	0.19	5.96	13	1.2CM, COLLAPSING	16	74
12	MR MANAVALAN A	55	M	3068573	172	84.3	2.02508	28.4951	6	NIL	130	80	6	32	149	48	31	11	13	12	13	77	29	63	0.9	0.7	1.24	149	0.11	9.27	33	24	4	18.9	10.7	43.3862	2.3	0.12	0.4	0.4	1.16	271	0.13	0.19	3.75	33	1.2CM/COLLAPSING	36	71
13	MRS POOMA	72	F	3068588	155	87.7	1.97781	36.5036	5	NIL	130	80	10.1	36	128	46	30	12	13	12	13	75	25	67	0.6	0.7	0.85	208	0.07	9.77	30	22	7	12.4	5.2	58.0645	2.2	0.14	0.3	0.4	0.67	263	0.07	0.14	4.29	14	1.1CM/COLLAPSING	17	66
14	MR THOMAS VICTOR	58	M	3073742	172	73	1.88053	24.6755	20	NIL	130	70	8.2	41	87	47	31	9	10	10	11	112	36	68	0.7	0.6	1.11	246	0.09	8.65	30	29	6	15	9.4	37.3333	1.9	0.13	0.4	0.2	1.57	332	0.11	0.1	3.84	23	1.0CM/COLLAPSING	26	86
15	MR KALAI SELVAN B	57	M	2780600	171	73.4	1.88119	25.1017	5	NIL	110	70	7.1	43	109	46	32	8	9	9	11	73	25	65	0.6	0.7	0.88	215	0.07	8.28	29	25	5	12.9	6	53.4884	1.8	0.12	0.4	0.4	1.05	203	0.1	0.09	4.66	14	1.1CM/COLLAPSING	17	101
16	MRS SANTHA SUNDAR	72	F	21935865	138	46	1.35105	24.1546	10	NIL	130	70	7.1			38	25	14	15	14	15	61	23	62	0.7	0.9	0.81	246	0.07	10.81	31	29	6	12.3	8.3	32.5203	1.8	0.15	0.3	0.3	1.12	323	0.07	0.17	5.21	18	1.0CM/COLLAPSING	21	68
17	MR NISHIKANTH	30	M	3068296	162	71.3	1.81145	27.1681	2M	NIL	120	80	12.2	36	148	43	28	9	11	9	10	67	23	66	0.8	0.6	1.33	152	0.11	7.54	31	27	4	12.9	7	45.7364	1.9	0.12	0.6	0.4	1.31	227	0.14	0.13	4.4	9	1.1cm/COLLAPSING	12	66
18	MR SWAMINATHAN	67	M	3077447	164	67.6	1.77161	25.1338	8	NIL	100	60	8.2	33	66	48	32	10	11	9	11	79	33	60	0.8	0.8	1.03	97	0.08	10.47	32	22	6	11.3	5.6	50.4425	1.8	0.1	0.4	0.5	0.88	126	0.11	0.15	4.35	31	1.2CM/COLLAPSING	34	68
19	MR SRINIVASAN	39	M	3071602	178	97.8	2.21783	30.8673	ND	NIL	110	80	6.2	38	143	45	29	9	10	9	12	73	24	67	0.5	0.7	0.77	155	0.09	6.88	31	27	4	13.3	8.3	37.594	1.9	0.11	0.6	0.5	1.25	209	0.13	0.16	5.12	7	0.9CM/COLLAPSING	10	72
20	MRS KUPPABAI	47	F	3076927	156	68.6	1.74773	28.1887	2	NIL	120	70	8.7			47	29	9	10	8	10	57	22	62	0.6	0.8	0.75	175	0.06	11.71	31	25	5	9.9	5.5	44.4444	2.1	0.14	0.6	0.7	0.86	130	0.14	0.19	4.46	12	1.1CM/COLLAPSING	15	78
21	MRS SELVI CHAKARAVATHI	53	F	3078341	153	57.8	1.58719	24.6914	10	NIL	120	70	10.7	43	118	42	28	9	10	8	10	57	23	60	0.8	0.6	1.28	177	0.08	10.77	33	30	5	14.9	8	46.3087	1.9	0.1	0.3	0.3	1.05	130	0.08	0.1	4.65	15	1.3CM/COLLAPSING	18	85
22	MRS BANU REKHA P	50	F	2790585	164	58.8	1.64893	21.862	4	NIL	110	70	11.8	66	109	40	27	11	12	11	13	46	18	60	0.7	0.7	1.12	174	0.09	9.02	30	20	5	9.7	6	38.1443	2.4	0.15	0.5	0.3	1.71	146	0.16	0.18	3.29	16	0.7CM/COLLAPSING	19	62
23	MR JOHN BRITTO	57	M	2903425	172	70	1.84036	23.6614	5	NIL	130	80	8.2	33	32	49	29	13	15	13	14	65	22	66	0.6	0.8	0.75	242	0.07	10.08	32	26	6	12.4	6.8	45.1613	2	0.09	0.4	0.3	1.03	263	0.08	0.11	5.39	12	1.0CM/COLLAPSING	15	76
24	MR SURESH KUMAR	49	M	2204917	167	64.3	1.73984	23.0557	3	NIL	110	70	12.4	47	105	42	27	9	10	8	10	79	26	66	0.7	0.5	1.32	143	0.07	9.79	30	26	6	13.8	6.2	55.0725	1.9	0.1	0.4	0.5	0.88	289	0.08	0.11	5.76	12	1.2CM COLLAPSING	15	74
25	MRS CARMELMARY S	59	F	21729186	153	61.7	1.64143	26.3574	20	NIL	120	70	7.4	41	75	41	27	10	11	9	12	66	20	64	0.7	0.9	0.77	189	0.07	9.76	34	30	6	14.8	8.3	43.9189	1.9	0.11	0.4	0.5	0.78	266	0.1	0.13	4.29	19	1.1CM/COLLAPSING	22	82
26	MRS VASUGHI R	53	F	2871271	157	62.2	1.66633	25.2343	5	NIL	120	70	6.8	48	157	37	25	8	9	8	10	55	22	61	0.8	0.6	1.24	164	0.08	9.75	29	23	4	11.7	6.1	47.8632	1.9	0.1	0.5	0.5	1.04	235	0.09	0.16	5.67	18	0.9CM/COLLAPSING	21	85
27	MR SAKTHIVEL MUNISAMY	54	M	3088526	169	69.7	1.8227	24.4039	2	NIL	120	70	7.9	25	90	48	32	12	13	12	13	110	40	64	0.8	0.7	1.16	188	0.08	11.06	31	25	5	13.8	7.8	43.4783	2	0.11	0.5	0.3	1.55	285	0.14	0.1	3.9	15	1.1CM/COLLAPSING	18	58
28	MRS AMEENA BEEVI	44	F	21907313	155	72.9	1.79838	30.3434	10	NIL	130	70	8.5	31	109	44	30	10	11	9	11	74	27	64	0.9	0.7	1.27	119	0.1	9.88	35	28	6	11.7	5.1	56.4103	2.1	0.11	0.6	0.5	1.16	169	0.14	0.16	4.41	13	1.3CM/ COLLAPSING DURING RESPIRATION	18	63
29	MRS SUBHA	38	F	2574057	150	67	1.69826	29.7778	6	NIL	120	70	8.2	54	131	42	28	7	8	8	10	63	25	60	0.7	0.8	0.95	144	0.09	8.95	33	28	4	10.8	6.6	38.8889	2	0.1	0.5	0.4	1.24	111	0.09	0.13	5.64	26	1.0CM/COLLAPSING	29	69
30	MR KAVIYARASU K	32	M	2474137	168	91	2.08553	32.2421	6M	NIL	120	70	6.1	33	121	44	29	7	8	8	9	82	35	60	0.5	0.4	1.22	253	0.09	6.66	37	30	5	23.3	12.8	45.0644	1.8	0.14	0.4	0.3	1.34	103	0.1	0.13	4.17	11	1.3CM/COLLAPSING	14	82
31	MR RAJIB SAHA	38	M	3071136	163	44	1.41672	16.5607	6	NIL	100	60	6.8	32	89	40	26	8	10	8	10	57	20	66	0.9	0.5	1.69	125	0.14	6.89	31	26	5	11.7	5.5	52.9915	1.7	0.13	0.5	0.3	1.49	148	0.1	0.09	5.63	18	0.8CM/COLLAPSING	21	74
32	MR SRINIVASAN M	39	M	2439667	168	67	1.78155	23.7387	1	NIL	130	90	5.9	39	36	40	26	9	11	9	11	64	22	65	1	0.7	1.37	172	0.09	10.16	33	29	6	13.6	8.6	36.7647	1.9	0.13	0.6	0.8	0.73	260	0.07	0.15	9.79	15	0.9CM/COLLAPSING	18	65
33	MR MOHAN KUMAR S	72	M	828948	168	78	1.9265	27.6361	20	NIL	120	70	7.6	49	134	46	30	9	10	10	11	66	24	63	0.5	0.9	0.63	146	0.05	12.46	31	27	6	11.8	6.1	48.3051	1.9	0.12	0.5	0.2	1.84	121	0.1	0.17	5.15	16	1.0CM/COLLAPSING	19	90
34	MR SELVAMANI A	71	M	3073757	168	69.6	1.81679	24.6599	13	NIL	120	80	10.6	39	114	46	31	11	12	12	13	64	27	57	0.6	0.9	0.76	204	0.06	10.68	33	27	6	12.5	6.6	47.2	2	0.11	0.5	0.6	0.89	98	0.1	0.15	5.59	23	1.3CM/COLLAPSING	26	69
35	MS SARASWATHY K	59	F	2396854	155	64.1	1.68319	26.6805	5	NIL	130	80	8.6	35	155	41	27	8	11	9	11	73	26	64	0.9	0.9	1.07	147	0.08	12.51	31	26	6	10	6.1	39	2.1	0.14	0.3	0.5	0.66	133	0.08	0.13	3.9	14	1.1CM/COLLAPSING	17	63
36	MRS EMELDA T	43	F	2462089	157	53	1.53459	21.5019	4NM	NIL	100	70	13.6	59	195	37	20	9	10	9	10	54	17	68	0.7	0.6	1.14	128	0.08	9.57	31	26	5	12	6.5	45.8333	1.9	0.14	0.7	0.6	1.14	128	0.08	0.13	9.57	21	1.0CM/COLLAPSING	24	68
37	MR GOPI T K	48	M	1033988	168	62.2	1.71469	22.038	2	NIL	130	80	10.3	35	118	49	31	8	9	7	9	76	25	76	0.7	0.6	1.15	129	0.09	8.15	29	24	4	14.4	6.7	53.4722	2	0.13	0.5	0.4	1.41	168	0.12	0.09	4.62	23	1.0CM/COLLAPSING	27	72
38	MR KUMARESAN G	73	M	2396852	163	69	1.78578	25.9701	10	NIL	150	80	9.2	39	118	46	30	11	13	11	13	74	23	67	0.8	0.9	0.9	169	0.1	8.26	33	26	4	14.9	6.7	55.0336	2.1	0.11	0.4	0.5	0.93	231	0.1	0.12	4.91	19	1.3CM/COLLAPSING	22	87
39	MR SARAVANAN	48	M	3058074	180	71	1.88979	21.9136	4	NIL	130	70	10	49	136	41	27	10	11	10	11	59	20	65	0.4	0.6	0.75	266	0.06	8.36	32	26	5	12.2	8.3	31.9672	1.8	0.12	0.4	0.3	1.22	209	0.08	0.12	5.74	22	1.4CM/COLLAPSING	25	68
40	MR MOHAN T	63	M	3074479	165	62.6	1.70731	22.9936	ND	NIL	120	80	6	44	168	49	32	8	9	8	10	59	21	65	0.5	0.6	0.84	178	0.06	9.22	30	24	5	12.8	7.5	41.4062	2.1	0.12	0.4	0.5	0.86	224	0.07	0.16	5.71	16	1.0CM/COLLAPSING	19	69
41	MR RAGHAVENDRA H	49	M	3079788	176	73.7	1.90823	23.7926	5	NIL	110	70	6.4	47	9	46	30	11	12	10	12	81	33	60	0.9	0.7	0.86	134	0.07	9.18	33	29	4	12.8	7.8	39.0625	2	0.1	0.5	0.4	1.23	164	0.08	0.1	6.13	14	0.9CM/COLLAPSING	17	69
42	MR MATHIAZHAGAN	57	M	3080012	178	87	2.08823	27.4587	2	NIL	120	70	6.1	37	86	41	28	11	12	11	13	90	34	62	0.6	0.8	0.75	238	0.05	10.97	36	32	6	16.7	7.5	55.0898	2.5	0.14	0.5	0.4	1.35	188	0.09	0.15	5.93	15	1.2CM/COLLAPSING	18	72
43	MR BIDHU BHUSAN DHAR	64	M	2876129	165	55.4	1.60327	20.3489	3	NIL	120	70	6.3	36	104	43	30	11	12	10	12	53	19	65	0.7	0.8	0.9	204	0.08	9.72	31	24	5	13.7	8.8	35.7664	1.9	0.1	0.4	0.3	1.51	225	0.08	0.13	5.77	8	1.0CM/COLLAPSING	11	88
44	MR SUJAS SAMANTA	40	F	3080819	168	66	1.76781	23.3844	2M	NIL	130	80	7.3	38	86	41	27	10	11	9	10	62	25	60	0.9	0.6	1.42	160	0.09	9.71	30	26	5	13.7	8.8	35.7664	1.9	0.11	0.5	0.3	1.49	212	0.09	0.1	5.53	18	1.2CM/COLLAPSING	21	57
45	MR JAGADESH K	27	M	3075331	166	79.1	1.93064	28.7052	1	NIL	110	60	10.4	30	141	45	30	8	10	9	10	83	33	60	0.9	0.6	1.3	208	0.1	9.17	34	28	5	17.5	9	48.5714	2.5	0.1	0.3	0.4	0.82	271	0.1	0.1	3.56	13	0.9CM/COLLAPSING	16	72
46	MR KARTHIKEYAN N S	40	M	2644345	168	93.5	2.11482	33.1278	2	NIL	120	70	6.3	39	134	46	27	9	10	8	9	63	21	67	0.8	0.6	1.2	128	0.09	8.79	30	23	4	11.6	7	39.6552	2.3	0.11	0.4	0.3	1.37	154	0.12	0.09	4.06	10	1.3CM/COLLAPSING	13	60
47	MR SHANMUGAM P	75	M	2786942	171	74	1.88908	25.3069	5	NIL	100	70	6.3			49	34	8	10	9	10	94	35	63	0.4	0.6	0.76	205	0.08	5.59	29	24	5	10.8	6.6	38.8889	2.1	0.13	0.5	0.4	1.19	284	0.12	0.14	4.33	11	1.1CM/COLLAPSING	14	74
48	MR VIJAYAKUMAR S	38	M	2915161	164	73.1	1.84437	27.1788	PREDM	NIL	130	90	9.4	38	70	39	29	9	10	9	10	61	24	60	0.9	1	0.89	144	0.09	9.65	26	25	6	13.8	8.1	41.3043	2	0.14	0.4	0.5	0.87	243	0.11	0.17	4.26	21	1.4CM/COLLAPSING	24	64
49	MR KRISHNAN T V	47	M	3075317	169	82.4	1.98665	28.8505	1	NIL	110	70	6.1	44	202	46	31	8	10	9	11	69	20	71	0.8	0.8	1.1	173	0.06	14.93	31	26	6	15.7	7.6	51.5924	2.1	0.1	0.3	0.2	1.25	273	0.1	0.08	3.64	16	1.3CM/COLLAPSING	19	65
50	MRS KALAISELVI	55	F	2922098	154	56.4	1.57161	23.7814	NIL	NIL	120	70	6	67	141	41	27	10	11	9	10	73	25	66	1	0.7	1.33	120	0.09	11.34	33	23	4	14.2	7.4	47.8873	2.2	0.13	0.5	0.4	1.13	219	0.12	0.17	4.57	28	0.9CM/COLLAPSING	31	64
51	MRS LAKSHMI	52	F	3031596	151	62.5	1.64319	27.4111	ND	NIL	120	70	6	46	146	41	29	10	11	9	10	55	22	60	0.6	0.7	0.84	103	0.08	7.82	30	25	5	10.7	6.2	42.0561	2.1	0.13	0.4	0.4	0.85	237	0.07	0.13	5.66	7	1.1CM/COLLAPSING	10	60
52	MR NAGARAJAN MR	55	M	3087600	157	60	1.63574	24.3418	5	NIL	100	60	9.4	32	187	40	27	11	13	11	12	62	21	67	0.9	0.7	1.26	148	0.08	13.1	32	29	5	14.5	5.8	60	1.9	0.1	0.5	0.3	1.55	144	0.1	0.14	5.43	14	1.3CM/COLLAPSING	17	76
53	MR SARANKAPANI	56	M	2877092	165	72.1	1.83605	26.483	2	NIL	120	80	6.1	42	160	44	27	9	10	9	10	86	25	71	0.7	0.9	0.79	202	0.08	9.22	33	30	6	15.5	10.7	30.9677	2.1	0.11	0.4	0.4	1.06	156	0.11	0.11	4.53	25	1.1CM/COLLAPSING	28	78
54	MR SYED ALI S	48	M	2119028	170	70.3	1.83532	24.3253	3	NIL	120	70	8.9			48	32	9	10	10	11	86	36	60	0.7	0.4	1.6	201	0.12	6.47	33	27	4	18.4	8.1	55.9783	2.3	0.15	0.4	0.3	1.18	220	0.11	0.15	4.11	11	1.3CM/COLLAPSING	14	78
55	MR ARIVESELVAN	39	M	2395114	174	76.7	1.93843	25.3336	5	NIL	120	80	11.4	33	145	43	29	10	11	10	11	68	37	60	0.4	0.6	0.76	128	0.07	6.94	27	22	5	13.2	9.1	31.0606	1.9	0.09	0.3	0.4	0.87	187	0.06	0.13	6.94	11	1.3CM/COLLAPSING	14	95
56	MR ARUMUGAM	59	M	21937968	165	79	1.92446	29.0174	4M	NIL	120	70	6.8	114	32	41	27	12	13	11	13	84	31	63	0.8	0.9	1.58	205	0.1	9.56	32	26	6	13.9	9	35.2518	2.1	0.11	0.4	0.3	1.12	219	0.07	0.19	6.35	28	0.9CM/COLLAPSING	31	63
57	MR NARAYANAN M	62	M	21881700	159	57	1.60167	22.5466	10	NIL	130	80	9	15	84	51	38	12	13	12	14	96	43	55	0.4	0.6	0.68	109	0.06	8.22	33	27	6	14.6	10	31.5068	1.7	0.14	0.4	0.3	1.33	137	0.08	0.15	5.41	19	1.1CM/COLLAPSING	22	87
58	MR HEMENDRA ROY	39	M	3081678	161.5	59.5	1.64827	22.8124	NIL	NIL	110	60	6.6	43	93	40	27	11	12	11	13	64	17	73	0.9	0.5	1.63	122	0.07	12.28	32	28	4	14.2	8	43.662	2.1	0.11	0.5	0.4	1.29	240	0.12	0.14	4.43	19	1.2CM/COLLAPSING	22	76
59	MRS BHABANI PAUL	41	M	3077441	153	83	1.91202	35.4564	ND	NIL	130	80	7	44	140	46	30	9	10	9	10	102	37	64	0.9	0.4	2.08	185	0.11	8.57	35	30	6	16.9	10.4	38.4615	2	0.11	0.3	0.3	1.13	135	0.11	0.1	3.18	16	1.3CM/COLLAPSING	19	84
60	MR PABAN CHANDRA DHAR	53	M	3005160	168	68.4	1.80061	24.2347	NIL	NIL	110	80	6.2	50	161	47	31	9	11	9	11	76	29	62	0.7	0.8	0.85	72	0.06	11.43	30	25	5	11.4	7	38.5965	1.8	0.11	0.5	0.4	1.16	150	0.13	0.11	4.16	19	1.2CM/COLLAPSING	22	66
[truncated: 4 more columns]

## Sheet: DM WITH HTN
	PERSONAL DETAILS								DIAGNOSIS		VITALS		BLOOD PARAMETERS			ECHO PARAMETERS
S.NO	PATIENT NAME	AGE	SEX	ID.NO	HEIGHT (CM)	WEIGHT (KG)	BSA	BMI	DM	HTN	SBP	DBP	HBA1C	HDL	LDL	LVEDD(MM)	LVESD (MM)	IVT D/S (MM)	IVST	PWT D/S (MM)	PWST	EDV (ML)	ESV (ML)	LV EF(%)	E (M/S)	A (M/S)	E/A (M/S)	DT (M/S)	E' (M/S)	E/E' (M/S)	RV DIMENSION		RV THICKNESS (MM)	RV DIASTOLIC AREA	RV SYSTOLIC AREA	RV FAC (%)	TAPSE (CM)	RV S' M/S	E(T)	A(T)	E/A (T)	DT (T)	E'(T)	A' (T)	E/E' (T)	TRPG	IVC (SIZE/COLLAPSIBILITY)	PAP	IVRT (MS)
																															BASAL	MID
1	MR VELMURUGAN	48	M	21891964	165.8	69.8	1.80937	25.3914	4	5	140	80	6.1	23	99	49	35	11	12	11	12	100	42	57	0.8	0.7	1.12	132	0.09	9.08	36	31	6.6	15.6	9.4	39.7436	1.8	0.12	0.5	0.5	1.12	117	0.07	0.11	7.14	14	1.2CM , COLLAPSING	14	84
2	MRS PUSHPALATHA R	59	F	3077686	165	83	1.974	30.4867	10	10	140	80	6.7	40	106	48	32	9	10	9	10	81	25	68	0.7	0.8	0.82	139	0.06	12.27	32	27	6	16.1	12	25.4658	2	0.16	0.5	0.5	0.99	169	0.1	0.12	5.64	31	1.4CM/COLLAPSING	34	57
3	MR NEDUNCHEZHIAN	65	M	2701105	165	67	1.76804	24.6097	8	5	130	80	8.4			48	34	12	15	13	15	64	21	67	0.6	1	0.58	106	0.05	12.39	24	16	7	17.8	10.8	39.3258	1.6	0.11	0.8	1.2	0.56	110	0.19	0.11	3.74	29	1.3CM,COLLAPSING	32	49
4	MRS PREMAVATHY	60	F	3077666	153	81.6	1.89536	34.8584	8	8	180	90	9.4	42	99	44	30	13	13	12	13	87	35	60	0.7	0.8	0.91	207	0.08	8.97	32	31	7	13.4	6.8	49.2537	1.9	0.12	0.5	0.6	0.79	226	0.06	0.07	8.38	21	0.9CM/COLLAPSING	24	84
5	MRS DEVAGI	71	F	2732438	147	65.7	1.66694	30.404	10	10	180	80	6.4	35	92	45	28	13	15	13	14	51	19	63	0.8	0.9	0.91	161	0.06	13.91	29	21	8	10.9	5.6	48.6239	1.8	0.09	0.4	0.5	0.82	185	0.08	0.1	5.85	32	0.9CM/COLLAPSING	35	68
6	MRS SUNDARI	74	F	20652418	153	62.6	1.6537	26.7419	13	10	150	100	6.7	46	124	41	27	14	15	13	14	66	28	60	0.5	0.8	0.6	171	0.05	9.09	32	25	8	11.8	5.7	51.6949	1.9	0.11	0.4	0.3	1.13	204	0.08	0.11	5.3	15	0.9CM/COLLAPSING	18	109
7	MR MURUGAN	59	M	2897708	163	87.3	2.01557	32.8578	6	8	150	80	7.9	42	56	48	32	12	13	13	14	72	27	63	0.9	0.9	1.02	150	0.08	12.47	35	23	8	14.7	8.4	42.8571	2.3	0.18	0.5	0.5	1.12	207	0.14	0.12	3.93	31	1.1CM,COLLAPSING	34	82
8	MR CHITTARANJAN JANA	54	M	2234778	169	67.7	1.7956	23.7037	PRE DM	1M	110	70	10.1	46	102	48	29	10	11	10	11	79	32	59	0.6	0.7	0.8	155	0.08	7.9	32	27	6	10.4	8.2	21.1538	1.8	0.11	0.5	0.3	1.4	247	0.06	0.1	8.32	14	1.2CM, COLLAPSING	17	74
9	MR MARIMUTHU A	79	M	3061075	161	60.3	1.65746	23.263	20	30	130	80	9.8	37	87	31	21	12	15	13	14	58	38	60	0.6	1.1	0.56	107	0.06	11.44	32	27	8	13	9.2	29.2308	1.7	0.1	0.4	0.5	0.85	193	0.05	0.08	8.67	25	1.0CM/COLLAPSING	28	49
10	MRS GITA TALUKDAR	59	F	3059451	154	64	1.67724	26.986	15	8	120	70	7.7	35	88	45	30	12	13	11	12	78	29	62	0.9	0.8	1.15	230	0.08	12.07	32	24	7	16.3	9.8	39.8773	1.9	0.11	0.5	0.6	0.76	263	0.09	0.14	5.92	21	1.3CM,COLLAPSING	24	67
11	MR SUNDARARAJAN	60	M	2888595	175	89.1	2.0989	29.0939	8	6	150	90	11.4	38	59	43	29	10	12	11	12	65	25	62	0.6	0.8	0.72	113	0.04	14.05	32	24	7	14.4	6.6	54.1667	1.9	0.11	0.3	0.4	0.7	140	0.07	0.14	4.26	14	1.4CM/COLLAPSING	17	65
12	MR ARUL SELVAN	34	M	2649328	174	85.9	2.05478	28.3723	6M	6M	140	80	6	43	112	42	28	9	10	10	11	86	33	60	0.7	0.7	1.02	229	0.07	11.01	33	28	6	18.5	10.5	43.2432	1.9	0.12	0.4	0.4	0.96	228	0.08	0.11	5.63	6	1.2CM/COLLAPSING	9	90
13	MR ALVIN	37	M	3059449	170	61.1	1.70753	21.1419	4	3	160	80	9.8	43	135	43	29	9	11	10	11	82	32	61	0.8	0.5	1.1	130	0.08	7.01	34	30	6	16	9.5	40.625	1.9	0.1	0.4	0.5	0.93	192	0.1	0.11	4.5	14	0.9CM/COLLAPSING	17	65
14	MR SAMIR MALLIK	48	M	3061171	161	58.7	1.63468	22.6457	3	3	130	80	7.6	68	101	39	26	8	9	10	11	61	22	64	0.9	0.6	1.44	160	0.11	8.29	34	29	7	13.7	8.6	37.2263	1.7	0.12	0.5	0.3	1.52	169	0.11	0.13	4.99	20	1.1CM/COLLAPSING	23	49
15	MR SHANKAR A SALUNKHE	40	M	3066907	184	115.5	2.45011	34.1151	6M	ACC	150	90	7.5	32	162	47	32	10	12	11	12	110	36	67	0.7	0.4	1.6	147	0.12	6.2	33	28	5	23.4	10.7	54.2735	2.1	0.11	0.4	0.3	1.27	264	0.11	0.1	3.98	13	1.3CM/COLLAPSING	16	74
16	MR PASUPATHY	55	M	3067274	172	81.7	1.9927	27.6163	2	ND	140	90	8.1	29	127	46	32	13	14	13	15	80	33	60	0.6	0.6	1.15	167	0.09	7.98	36	28	5	17.9	8.9	50.2793	2.1	0.1	0.4	0.3	1.36	252	0.11	0.09	4.56	24	1.2CM, COLLAPSING	27	72
17	MR MURALIKRISHNA	43	M	3067285	170	76.7	1.91948	26.5398	ND	ACC	150	100	6	34	154	50	33	10	11	10	11	85	35	60	0.8	0.7	1.11	169	0.1	7.96	33	27	5	14.2	7.1	50	2.1	0.11	0.9	0.5	1.59	257	0.11	0.1	8.62	29	1.0CM, COLLAPSING	32	71
18	MR PRABIR KUMAR DAS	56	M	3060319	159	64.2	1.70277	25.3946	ND	ACC	140	90	5.9	29	79	46	30	8	10	9	10	83	33	61	0.7	0.6	1.09	102	0.12	6.39	36	25	5	17.5	8.2	53.1429	2.5	0.12	0.5	0.3	1.58	205	0.15	0.16	3.67	17	1.1CM/COLLAPSING	20	74
19	MR SADHAM USEN AMEEDH BASHA	30	M	21887820	169	98.4	2.17659	34.4526	2	6M	130	90	9.1	28	209	44	30	12	13	13	14	79	27	66	0.9	0.7	1.24	223	0.08	10.78	35	26	7	18.2	11.2	38.4615	2.4	0.13	0.4	0.5	0.75	204	0.1	0.13	4	19	1.1CM,COLLAPSING	22	68
20	MR DURAIKANNU P	63	M	2960645	162	66.5	1.74763	25.3391	10	12	150	90	5.6	41	172	40	27	8	9	7	8	98	43	56	0.7	0.8	0.84	135	0.06	11.55	33	27	6	13.1	6.9	47.3282	2	0.09	0.4	0.4	1.01	256	0.09	0.15	4.89	8	1.0CM,COLLAPSING	11	69
21	MRS BIJOYA DUTTA	66	F	3086571	146	65.4	1.65823	30.6812	10	10	140	80	6.6	55	64	38	25	13	14	13	15	56	20	63	0.8	0.9	0.91	192	0.06	14.26	27	22	7	10.9	5.6	48.6239	1.8	0.1	0.4	0.4	1.14	261	0.1	0.13	5.06	25	1.2CM/COLLAPSING	28	63
22	MR PRATUL KUMAR NANOY	31	M	3068572	171	90.6	2.09642	30.9839	1M	3	150	90	5.8	55	90	47	32	9	11	10	11	105	38	64	0.8	0.6	1.41	138	0.13	6.88	33	25	5	16.1	6.5	59.6273	2.5	0.18	0.7	0.4	1.51	256	0.18	0.18	4.03	16	1.1CM/COLLAPSING	19	63
23	MRS SUMATHI	54	F	3068574	154	57.2	1.58305	24.1187	3	5	130	80	7.4	85	36	40	26	11	13	12	13	70	24	67	0.6	0.6	1.13	144	0.05	12.73	34	29	8	10.9	4.1	62.3853	2	0.11	0.4	0.3	1.46	189	0.07	0.08	6.39	9	1.2CM/COLLAPSING	12	83
24	MR NARAYAN P KULKARNI	46	M	3068584	179	81.4	2.02274	25.4049	7	9	140	90	7.7	30	104	41	27	11	13	11	13	93	32	65	0.8	0.6	1.27	165	0.09	9.62	34	30	7	19.9	10.1	49.2462	2.1	0.1	0.4	0.3	1.33	144	0.09	0.12	4.5	25	1.2CM/COLLAPSING	28	59
25	MR MANIKANDAN	45	M	916721	176	79.5	1.98408	25.665	9	3	144	92	8.9			46	30	11	12	12	13	75	25	67	0.7	0.6	1.15	184	0.07	11.03	31	27	6	17.3	10.7	38.1503	1.9	0.1	0.6	0.4	1.48	198	0.07	0.11	9.13	12	0.8CM,COLLAPSING	15	64
26	MS MALLIKA	76	F	2593010	152	60	1.61352	25.9695	15	5	140	80	6.9	33	132	41	27	13	14	13	14	76	28	63	0.8	1.1	0.83	173	0.07	13.19	30	25	7	15.1	8.7	42.3841	1.9	0.15	0.4	0.5	0.73	202	0.09	0.15	4.77	15	1.5CM/COLLAPSING DURING RESPIRATION	18	71
27	MRS PRASANNA	67	F	3085581	151	85.2	1.92719	37.3668	8	15	150	70	6.4	44	141	43	28	11	12	10	11	64	23	65	0.5	0.7	0.69	144	0.06	8.5	29	24	7	14.5	7.6	47.5862	2	0.14	0.3	0.5	0.69	189	0.06	0.12	5.8	18	1.2CM/COLLAPSING	21	65
28	MRS PUSHPAVALLI	57	F	2903281	162	87	2.00677	33.1504	8	8	140	80	6.5	56	137	48	32	9	10	9	10	55	14	74	0.5	0.6	0.6	266	0.05	11.1	30	25	9	13.1	7.3	44.2748	2.1	0.13	0.6	0.7	0.8	167	0.09	0.12	6.68	11	1.6CM/COLLAPSING DURING RESPIRATION	16	62
29	MRS JASINTHAMARY PAUL THANARAJ	70	F	3075316	150	54.3	1.52419	24.1333	22	18	150	80	7.2	62	97	40	30	9	12	11	13	57	37	60	0.7	0.8	0.83	230	0.06	11.31	28	21	7	7.5	3.2	57.3333	2.1	0.11	0.6	0.5	1.07	323	0.07	0.16	9.1	15	0.8CM/COLLAPSING	18	65
30	MRS BANUMATHI	64	F	3077259	159	63	1.68632	24.9199	6	2M	146	86	8.3			49	32	9	10	10	11	57	21	63	0.8	0.7	1.18	138	0.07	12.02	36	28	6	15.5	9.2	40.6452	1.9	0.09	0.4	0.5	0.79	216	0.1	0.11	4.37	16	1.0CM/COLLAPSING	19	53
31	MS SELVI	55	F	2206553	155	62.1	1.65596	25.8481	3	8	150	80	6.3	52	163	37	25	12	14	13	14	72	29	63	1.2	1.1	1.14	205	0.08	15.4	30	23	6	11.1	5.4	51.3514	2	0.1	0.7	0.4	1.78	212	0.1	0.16	7.61	21	1.0CM/COLLAPSING	24	55
32	MRS SUDHA DEVI	43	F	3085616	147	67.6	1.69157	31.2833	1	2	140	80	6	48	127	41	27	9	11	10	11	67	25	63	0.9	0.7	1.17	186	0.11	8.29	30	26	6	10.8	6.6	38.8889	2	0.14	0.6	0.7	0.82	250	0.11	0.15	5.64	23	0.9CM/COLLAPSING	26	68
33	MRS SAROJA	66	F	3077384	152	73.6	1.79238	31.856	-	-	150	80	6.5	34	124	48	32	9	10	10	11	114	40	65	0.5	0.7	0.71	210	0.04	12.5	26	22	5	10.6	4.3	59.434	2	0.09	0.4	0.3	1.28	270	0.09	0.12	5.17	17	1.2CM/COLLAPSING	20	79
34	MRS PRAMILA BORO	68	F	3077396	156	54	1.54524	22.1893	10	10	150	90	6	62	94	45	31	10	11	11	12	70	24	66	0.6	0.7	0.84	237	0.07	8.56	32	28	8	14.1	6	57.4468	2.2	0.15	0.5	0.4	1.23	223	0.12	0.18	4.82	19	0.9CM/COLLAPSING	22	72
35	MR RAJENDRAN R	69	M	2447000	160	66	1.73175	25.7812	6	8	130	80	6	44	86	40	27	11	13	12	13	66	22	67	0.9	1	0.88	139	0.06	14.61	32	27	7	12.6	7	44.4444	2.3	0.14	0.7	0.5	1.32	170	0.11	0.13	6.36	26	1.1CM/COLLAPSING	29	69
36	MRS SARASWATHI G	74	F	21869117	145	51.5	1.46213	24.4946	10	15	140	80	9.9	26	56	38	25	14	15	14	15	52	20	62	0.8	1.2	0.73	237	0.05	16.82	31	25	7	13.5	8.7	35.5556	1.8	0.1	0.5	0.4	1.26	253	0.06	0.09	9.47	12	1.1CM/COLLAPSING	15	87
37	MR GUNA SEKARAN M C	70	M	3071598	172	76.6	1.92769	25.8924	18	11	150	80	8.6	34	116	45	26	12	13	11	13	62	20	68	0.5	0.8	0.71	230	0.07	8.62	34	26	8	13.4	8.6	35.8209	1.9	0.12	0.6	0.6	0.97	223	0.1	0.17	5.93	13	1.0CM/COLLAPSING	16	65
38	MR MANIKANDAN S	45	M	916721	176	79.5	1.98408	25.665	8	8	144	92	8.9			46	30	11	12	12	13	75	25	67	0.7	0.6	1.15	184	0.07	11.03	31	27	6	17.3	12.7	26.5896	1.9	0.1	0.6	0.4	1.48	198	0.07	0.11	9.13	12	0.8CM/COLLAPSING	15	64
39	MRS MERCY QUEENIE	65	F	3078603	155	105.3	2.17298	43.8293	8		140	90	12.1	73	106	43	29	12	14	13	15	62	42	64	0.6	1.3	0.52	161	0.07	9.67	32	25	7	11.4	7.9	30.7018	2.2	0.09	0.7	0.4	1.58	110	0.1	0.15	7.26	15	1.4CM/COLLAPSING DURING RESPIRATION	20	55
40	MRS EVA SAHA	58	F	2774630	152	61.3	1.63142	26.5322			130	80	6.4	48	71	39	26	11	12	11	14	56	19	66	0.8	0.9	0.99	192	0.07	12.16	31	25	7	13.6	7	48.5294	2	0.16	0.6	0.5	1.16	258	0.11	0.19	5.41	18	1.0CM/COLLAPSING	21	69
41	MRS PREMAVATHY	60	F	3077666	153	81.6	1.89536	34.8584	4	5	180	90	9.4	42	99	44	30	12	13	13	14	87	35	60	0.7	0.8	0.91	207	0.08	8.97	32	31	7	13.4	6.8	49.2537	1.9	0.12	0.5	0.6	0.79	226	0.06	0.07	8.38	21	0.9CM/COLLAPSING	24	84
42	MS SUMA T G	41	F	978632	156	73.2	1.80708	30.0789			160	90	9.7	36	153	39	25	10	12	10	11	69	25	64	0.9	0.9	1.05	132	0.09	10.6	35	25	5	14.2	5.3	62.6761	2.5	0.13	0.5	0.6	0.73	180	0.13	0.16	4.22	14	1.5CM/PARTIALLY COLLAPSING	22	63
43	MR ANJAN KUMAR BISWAS	58	M	3073476	170	69	1.81778	23.8754			140	80	5.9	40	112	47	29	11	13	11	14	89	30	66	0.6	0.9	0.73	206	0.06	11.19	31	28	7	13.1	8.1	38.1679	2.2	0.1	0.4	0.4	0.96	280	0.07	0.1	6.17	19	1.3CM/COLLAPSING	22	90
44	MR SURENDRA NAIDU	75	M	3082892	172	80.8	1.98138	27.3121	2M	10	160	70	7.2	30	160	49	33	13	14	14	15	67	27	59	0.7	0.9	0.76	174	0.04	15.4	30	27	6	12.5	6.8	45.6	1.8	0.11	0.4	0.5	0.74	147	0.05	0.12	8.15	15	1.3CM/COLLAPSING	18	103
45	MRS SELIMA BIBI	55	F	3074497	153	69.9	1.75028	29.8603			160	90	6.3	86	139	42	27	7	9	8	11	72	26	64	0.5	0.7	0.66	168	0.05	10.32	33	27	8	11.4	5.7	50	2	0.12	0.4	0.4	1.01	267	0.1	0.12	4.74	22	1.0CM/COLLAPSING	25	58
46	MRS SHOBA RAJKUMAR	57	F	3072681	149	83	1.89074	37.3857			120	80	5.7	44	107	40	26	10	11	8	9	66	21	68	0.8	0.8	1.05	259	0.1	8.46	35	26	5	11.6	5.3	54.3103	2.2	0.17	0.7	0.8	0.92	202	0.15	0.15	4.96	27	1.0CM/COLLAPSING	30	58
47	MRS HASAIN BASIRI	64	F	3067813	158	71	1.78853	28.441			150	80	10.1			46	31	12	13	12	14	61	18	70	0.6	0.8	0.79	211	0.04	14.64	30	26	6	8.4	3.5	58.3333	2	0.1	0.4	0.4	1	301	0.08	0.12	5.3	18	0.9CM/COLLAPSING	21	73
48	MR SIVA PONNUSAMY	62	M	21940632	164	80.2	1.93447	29.8186	8	2	150	80	12.1	33	78	45	32	12	13	12	13	99	35	65	0.7	0.9	0.8	253	0.05	13.8	29	31	7	18.2	11.7	35.7143	2.1	0.14	0.5	0.6	0.85	247	0.08	0.19	6.26	23	1.4CM/COLLAPSING	26	74
49	MRS AMUDHA L	58	F	2559204	151	64.1	1.6647	28.1128			140	80	7.2			37	25	11	13	12	13	61	19	69	0.7	0.9	0.81	190	0.07	11	30	24	6	10.3	5.9	42.7184	2	0.12	0.4	0.5	0.82	235	0.12	0.2	3.83	20	1.2CM/COLLAPSING	23	81
50	MRS RAMANI	66	F	3086540	147	71.5	1.7411	33.0881	1	ND	140	80	7.3	32	181	42	24	10	11	9	11	72	28	60	0.6	0.9	0.96	149	0.07	9.05	30	26	6	13.3	8.4	36.8421	2.2	0.2	0.6	0.5	296	1.12	0.14	0.24	4.66	21	1.3CM/COLLAPSING	24	65
51	MR RAVI	58	M	20545446	160	60.2	1.65169	23.5156	10	10	170	100	9.7	27	118	38	25	11	13	11	12	62	19	69	0.5	0.7	0.73	226	0.06	9.98	30	25	7	11.7	7.8	33.3333	1.8	0.12	0.4	0.3	175	1.45	0.06	0.14	7.64	11	1.1CM/COLLAPSING	14	64
52	MR SINGARAVELU G	66	M	3077665	177	74	1.91681	23.6203			150	80	10.7	42	104	45	31	13	14	13	14	94	38	60	0.7	0.8	0.8	142	0.06	12.27	35	30	7	14.8	6.4	56.7568	2.1	0.1	0.4	0.3	1.14	278	0.09	0.2	4.93	12	1.6CM/COLLAPSING DURING RESPIRATION	15	60
53	MRS SAMPAKIRTANIE	49	F	3078390	148	60.9	1.60772	27.8031			160	80	5.8	53	141	44	30	12	13	13	14	62	15	64	0.9	0.6	1.42	166	0.1	8.91	31	27	6	15.3	7.8	49.0196	1.9	0.11	0.4	0.4	1.13	224	0.13	0.12	3.59	18	0.9CM/COLLAPSING	21	81
54	MS THILAGAVATHI	60	F	2122818	169	85.7	2.02719	30.006			200	100	7.1	40	193	47	30	12	13	11	14	107	39	63	0.7	1	0.74	190	0.06	13.36	26	18	7	16.8	8.7	48.2143	2.3	0.12	0.7	0.6	1.22	280	0.12	0.13	6.18	28	1.5CM/PARTIALLY COLLAPSING	31	61
55	MR VINAYAGAMOORTHY S	50	M	843540	167	67.4	1.78251	24.1672	3M	5	140	80	6	35	151	40	26	8	9	9	11	82	30	64	0.9	0.8	1.17	244	0.08	10.47	32	29	5	14.2	8.1	42.9577	2.1	0.13	0.4	0.2	1.53	186	0.09	0.15	4.33	12	1.4CM/COLLAPSING DURING RESPIRATION	15	71
56	MR NAVARATHINAM C	58	M	3071608	172	70	1.84036	23.6614	18	18	140	80	13.4	49	71	42	28	14	15	15	16	58	23	60							31	25	6	12.4	7.8	37.0968	1.9	0.13	0.4	0.4	0.84	124	0.09	0.16	4.25	20	1.2CM/COLLAPSING	23	65
57	MR VIJAYA KUMAR H	44	M	3071603	168	87.5	2.04386	31.002	8	6	150	90	10.6	26	85	42	28	10	11	11	13	80	30	62	0.8	0.6	1.36	166	0.08	11.24	31	25	7	14.8	10.2	31.0811	2.1	0.11	0.5	0.6	0.78	200	0.08	0.11	6.68	23	1.3CM/COLLAPSING	26	79
58	MR KRISHNAMOORTHY S	63	M	3069577	174	73.6	1.89771	24.3097	6	ND	160	80	6.6	45	60	40	28	11	12	11	13	78	26	67	0.6	1	1.06	178	0.08	8.38	32	27	9	12.5	7.4	40.8	2	0.14	0.5	0.4	1.26	235	0.14	0.27	4.14	14	1.1CM/COLLAPSING	17	103
59	MRS PRASANNA	67	F	3085581	151	85.2	1.92719	37.3668	8	15	150	70	6.4	44	141	43	28	10	11	9	11	64	23	65	0.5	0.7	0.69	144	0.06	8.5	29	24	7	14.5	7.6	47.5862	2	0.14	0.3	0.5	0.69	189	0.06	0.12	5.8	18	1.2CM/COLLAPSING	21	65
60	MS TAMIL PAVAI M	55	F	2376086	155	70	1.7612	29.1363	10	6	140	90	6.2	46	128	47	31	9	11	10	12	103	38	63	0.7	0.9	0.78	179	0.09	8.05	35	31	6	18.7	10	46.5241	2.3	0.1	0.6	0.5	1.1	202	0.09	0.14	7.58	14	1.3CM/COLLAPSING	17	87
61	MR VINOTHKUMAR	35	M	3085853	180	78.5	1.99001	24.2284			150	90	5.3	48	135	51	35	9	10	10	11	78	31	61	0.7	0.6	1.08	151	0.1	7.02	31	25	7	15.1	8.3	45.0331	2.4	0.14	0.4	0.3	1.54	213	0.09	0.12	5.39	20	1.1CM/COLLAPSING	23	77
62	MR ELANGOVAN	48	M	2948757	170	50.1	1.54174	17.3356			150	80	12.6	89	159	46	31	11	12	11	13	47	17	64	0.5	0.6	0.83	179	0.08	7.54	32	23	6	14.7	6.9	53.0612	1.9	0.13	0.4	0.4	0.92	201	0.09	0.22	4.95	19	0.9CM/COLLAPSING	22	53
63	MR PALANI RAJAN P R	50	M	2906625	165	88.4	2.03907	32.4702			140	90	8.3	32	126	45	31	11	12	11	12	74	30	60	0.6	0.7	0.83	178	0.06	10.06	34	28	6	17.5	11.1	36.5714	1.8	0.11	0.7	0.5	1.54	166	0.11	0.16	7.24	19	1.3CM/COLLAPSING	22	75
64	MR VASANTHA KUMAR	72	M	3080768	155	57.3	1.58881	23.8502			140	80	5.3	51	135	40	26	13	14	12	14	71	31	58	0.8	1	0.8	229	0.05	16.17	31	23	7	12	6.9	42.5	2.1	0.1	0.4	0.6	0.74	331	0.09	0.11	5.38	36	1.3CM/COLLAPSING	39	57
65	MRS HASINA KHATOON	55	F	3080794	145	57.9	1.55297	27.5386	5	2	160	80	9.3	50	113	38	26	11	12	11	13	60	21	65	0.7	0.9	0.8	189	0.06	11.79	28	24	8	12.6	7.6	39.6825	1.8	0.12	0.6	0.5	1.31	216	0.08	0.12	8.08	15	1.2CM/COLLAPSING	18	64
66	MRS RAJESWARI	69	F	3080528	155	59.5	1.61991	24.7659	10	7	180	70	10.5	48	134	40	27	11	13	11	14	59	23	61	0.8	1.1	0.73	209	0.05	15.17	26	20	7	11.4	6.3	44.7368	2	0.1	0.7	0.6	1.07	184	0.09	0.15	8.05	23	1.1CM/COLLAPSING	26	64
67	MRS ANDONIAMMALLE K	72	F	3086200	156	55.2	1.56281	22.6824	30	10	170	80	8	77	71	43	27	13	14	13	15	58	19	68	1	0.9	1.11	166	0.07	15.41	32	25	6	15.8	8.5	46.2025	2.1	0.12	0.7	0.4	1.78	169	0.09	0.16	7.65	14	1.0CM/COLLAPSING	17	62
68	MR SEKAR	63	M	2321450	155	59.5	1.61991	24.7659	1.5	2M	150	90	7.3	144	52	47	31	12	13	11	13	79	27	65	0.4	0.6	0.73	186	0.05	9.58	31	28	6	13.2	8.4	36.3636	1.8	0.1	0.3	0.4	0.85	303	0.07	0.1	5.13	22	0.9CM/COLLAPSING	25	74
69	MRS DAMAYANTHI SURESHCHAND	68	F	2339328	153	52.7	1.51352	22.5127	2	7	150	100	5.9	50	89	40	26	11	13	11	13	56	20	62	0.7	1	0.69	231	0.07	10.06	29	22	6	9.9	5.9	40.404	1.8	0.12	0.5	0.5	0.92	202	0.09	0.16	6.23	11	1.1CM/COLLAPSING	14	60
70	MR RAJASEKAR	56	M	3074245	173	73.8	1.89574	24.6584	10	1	150	90	7.8			36	25	11	12	11	13	82	20	68	0.6	0.9	0.65	170	0.06	10.99	34	24	5	12.9	8.2	36.4341	1.9	0.13	0.4	0.5	0.79	203	0.08	0.14	5.72	12	1.4 CM/COLLAPSING	15	62
71	MRS SELVANAYAGI S	68	F	2436235	160	70	1.78498	27.3438	4	4	140	80	6.3	49	44	49	32	11	13	11	14	68	33	62	0.9	1.1	0.86	189	0.09	10.73	31	26	7	14	7.7	45	2.1	0.11	0.4	0.5	0.79	250	0.08	0.14	5.35	35	1.4CM/PARTIALLY COLLAPSING	38	69
72	MR THAMIZH SELVAN N	57	M	3077390	166	69.6	1.80762	25.2577	5	5M	140	80	10.8	41	95	41	27	8	10	8	10	72	23	68	0.6	0.7	0.86	124	0.08	8.44	34	26	9	16.5	9.3	43.6364	2.1	0.11	0.7	0.6	1.22	165	0.11	0.09	6.9	21	1.1CM/COLLAPSING	24	74
73	MRS MANJULA	54	F	3077688	161	78.7	1.90089	30.3615	2	3M	140	90	6.5	38	128	49	31	9	10	9	10	65	27	60	0.7	0.9	0.77	146	0.07	9.85	30	26	7	14.8	7.1	52.027	1.8	0.1	0.5	0.4	1.24	165	0.1	0.11	5.74	15	1.3CM/COLLAPSING	18	71
74	MS RAMALAKSHMI	42	F	2990516	162	114.2	2.3083	43.5147	1	3	150	90	6.2	46	137	44	30	11	13	12	13	79	28	65	0.8	0.7	1.18	144	0.09	9.46	30	24	6	12.6	6	52.381	1.7	0.14					0.12	0.18	4.16	17	1.3CM/COLLAPSING DURING RESPIRATION	20	71
75	MRS RAMANI L	66	F	3086540	147	71.5	1.7411	33.0881	2	3	140	80	7.3	32	181	42	24	10	11	9	11	72	28	60	0.8	0.7	1.18	144	0.09	9.46	30	26	7	13.3	8.4	36.8421	2.2	0.2	0.6	0.5	1.12	296	0.14	0.24	4.66	21	1.3CM/COLLAPSING	24	65
[truncated: 4 more columns]

## Sheet: CONTROL
	PERSONAL DETAILS								DIAGNOSIS		VITALS		BLOOD PARAMETERS			ECHO PARAMETERS
S.NO	PATIENT NAME	AGE	SEX	ID.NO	HEIGHT (CM)	WEIGHT (KG)	BSA	BMI	DM	HTN	SBP	DBP	HBA1C	HDL	LDL	LVEDD(MM)	LVESD (MM)	IVDT (MM)	IVST (MM)	PWDT (MM)	PWST (MM)	EDV (ML)	ESV (ML)	LV EF(%)	E (M/S)	A (M/S)	DT (M/S)	E/A (M/S)	E' (M/S)	E/E' (M/S)	RV DIMENSION		RV THICKNESS (MM)	RV DIASTOLIC AREA	RV SYSTOLIC AREA	RV FAC (%)	TAPSE (CM)	RV S' M/S	E(T)	A(T)	E/A (T)	DT (T)	E'(T)	A' (T)	E/E' (T)	TRPG	IVC (SIZE/COLLAPSIBILITY)	PAP	IVRT (MS)
																															BASAL	MID
1	MR STEFF FRANCIS	31	M	3041310	160	85.3	1.9761	33.3203	NIL	NIL	120	70	5.3	46	108	44	29	9	12	9	10	110	34	70	0.9	0.7	190	1.24	0.14	7.08	35	29	4	15.3	7.9	48.366	2.3	0.18	0.5	0.5	1.12	207	0.14	0.12	3.93	31	1.1CM/COLLAPSING	34	82
2	MRS POOMPAVAI	57	F	3068315	146	79.1	1.82872	37.1083	NIL	NIL	130	90	5.9	107	120	38	28	10	11	9	10	55	23	60	0.7	0.8	182	0.9	0.08	9.89	28	23	4	12.2	7.5	38.5246	2	0.1	0.4	0.4	1.09	240	0.09	0.09	5.03	14	1.1CM,COLLAPSING	17	74
3	MR ABIR BARAN PAL	31	M	3061167	165	81	1.94938	29.7521	NIL	NIL	110	70	5.6	45	110	41	28	10	11	10	11	61	25	63	0.9	0.6	174	1.42	0.1	9.87	32	29	3	13.9	8.7	37.4101	2	0.12	0.5	0.3	1.48	251	0.12	0.1	4.66	11	1.1CM,COLLAPSING	14	76
4	MR PALANI	70	M	20714862	169	77.5	1.92495	27.1349	NIL	NIL	120	80	5.5	33	154	48	31	12	14	13	14	120	45	62	0.6	0.8	125	0.69	0.07	8.14	31	28	5	14.6	7.1	51.3699	2.3	0.12	0.3	0.4	0.88	230	0.13	0.14	2.93	14	1.0CM, COLLAPSING	17	76
5	MRS SUMAIYA	46	F	3061134	147	67.8	1.69414	31.3758	NIL	NIL	160	80	5.5	49	138	47	31	9	10	9	11	103	39	69	0.9	0.6	134	1.44	0.11	8.71	29	22	4	12.9	6.4	50.3876	2	0.16	0.9	0.6	1.44	214	0.16	0.14	5.78	21	0.8CM,COLLAPSING	24	76
6	MR NESHANTH RAGAVENDER	21	M	3067891	168	68.7	1.80466	24.341	NIL	NIL	120	70	5.1			40	26	8	9	8	9	59	23	62	0.7	0.6	123	1.19	0.12	6.06	31	26	4	15.9	9.6	39.6226	2	0.13	0.5	0.5	1	293	0.12	0.12	4.41	9	1.1CM,COLLAPSING	12	69
7	MR SANDIP DAS	33	M	3068590	167	93	2.10368	33.3465	NIL	NIL	130	80	5.6	61	177	43	29	10	11	10	10	89	30	66	0.9	0.7	138	1.34	0.09	9.95	33	27	3	17.3	10.1	41.6185	2	0.1	0.4	0.4	1.06	205	0.09	0.07	5.48	20	1.4CM,COLLAPSING	23	66
8	MISS AYANTIKA ROY BARDHAN	26	F	3066241	152	54	1.52838	23.3726	NIL	NIL	120	70	5.2	46	156	41	27	7	8	7	8	86	37	60	0.6	0.4	118	1.52	0.1	7.04	31	21	3	12.7	7.2	43.3071	1.9	0.11	0.5	0.4	1.14	194	0.11	0.11	4.85	21	1.4CM,COLLAPSING	24	64
9	MRS THENMOZHI	44	F	2675223	150	52.7	1.50091	23.4222	NIL	NIL	120	80	5.4	60	126	36	24	9	10	6	9	66	44	66	0.6	0.4	169	1.41	0.12	5.49	33	21	4	11.3	6.4	43.3628	2.2	0.13	0.5	0.3	1.45	195	0.15	0.14	3.46	13	1.1CM/COLLAPSING	13	83
10	MR SENTHIL NADHAN	47	M	3068620	175	86.7	2.06961	28.3102	NIL	NIL	110	70	5.9	37	134	43	29	9	10	10	11	70	24	66	0.8	0.6	168	1.23	0.1	8.08	29	23	6	15	7.9	47.3333	2.1	0.12	0.5	0.4	1.18	268	0.11	0.12	4.97	25	1.2CM/COLLAPSING	28	72
11	MR RANJITH KUMAR	35	M	3068312	180	79.7	2.0056	24.5988	NIL	NIL	110	60	5.4	48	141	49	33	10	11	10	12	89	33	63	0.6	0.5	204	1.16	0.1	6.66	36	27	4	15.8	9.9	37.3418	1.9	0.14	0.5	0.3	1.54	249	0.13	0.11	3.76	9	1.3CM,COLLAPSING DURING RESPIRATION	12	78
12	MRS SANJUTHA R	25	F	3061181	157	68	1.74455	27.5873	NIL	NIL	110	80	5.6	35	99	41	28	9	10	8	10	53	20	61	0.6	0.5	172	1.21	0.07	9.15	30	25	3	11.3	6.3	44.2478	2.3	0.12	0.6	0.4	1.47	216	0.13	0.1	5.08	19	1.2CM,COLLAPSING	22	78
13	MRS JAYA RENUKA	31	F	2921266	164	64.7	1.73209	24.0556	NIL	NIL	110	70	5.9	51	113	40	25	9	10	8	10	46	15	67	1.1	0.9	111	1.23	0.13	9.07	32	23	5	10.4	5.8	44.2308	2.3	0.15	0.5	0.3	1.33	218	0.18	0.1	2.71	8	0.8CM/COLLAPSING	11	71
14	MR DILIP CHANDRA NATH	43	M	3061147	166	49.8	1.5216	18.0723	NIL	NIL	140	90	5.5	71	64	42	29	7	8	8	9	71	27	62	0.7	0.5	209	1.51	0.13	5.95	33	21	4	17.5	10.1	42.2857	2	0.11	0.5	0.3	1.59	152	0.09	0.09	5.56	10	1.1CM/COLLAPSING	13	71
15	MR JAMBULINGAM	65	M	2610151	164	64.2	1.72519	23.8697	NIL	NIL	180	80	5.5	56	136	44	29	11	13	12	13	79	44	61	0.9	0.7	180	1.21	0.07	12.76	32	23	6	14.6	8.5	41.7808	2	0.12	0.5	0.2	2	145	0.12	0.12	4.26	24	1.1CM/COLLAPSING	27	72
16	MR SWAPNIL KUMAR CHANDRA	27	M	3061412	161	64	1.70904	24.6904	NIL	NIL	90	70	4.8	55	89	48	32	8	10	8	11	106	35	67	0.7	0.4	170	1.62	0.12	5.77	32	27	5	20.3	12.4	38.9163	2	0.12	0.6	0.3	2.16	151	0.1	0.09	6.62	17	1.3CM/COLLAPSING	20	76
17	MS SAKTHI REKHA	43	F	2115075	161	82.3	1.94514	31.7503	NIL	NIL	120	80	5.7	40	122	43	28	9	11	9	10	85	30	65	1	0.7	148	1.39	0.1	9.84	31	26	3	16.3	9.6	41.1043	2.1	0.12	0.3	0.3	1	286	0.11	0.15	3.27	14	1.0CM/COLLAPSING	17	74
18	MS ANITHA	42	F	842878	182	91.8	2.167	27.714	NIL	NIL	110	60	5.4	46	135	42	27	8	10	9	10	70	22	68	0.8	0.5	171	1.48	0.12	6.47	30	23	3	13	8.2	36.9231	2.4	0.13	0.4	0.4	0.91	256	0.11	0.11	3.76	16	0.8CM/COLLAPSING	19	74
19	MISS ROOPASRI	25	F	2779881	149	58.4	1.57789	26.3051	NIL	NIL	110	70	5.8	63	104	40	25	8	9	7	8	54	19	66	1.1	0.6	105	1.79	0.13	8.18	30	23	4	11.8	6.3	46.6102	2.1	0.11	0.6	0.4	1.48	272	0.15	0.1	4.18	25	1.2CM,COLLAPSING	28	69
20	MR RAMANATHAN	74	M	3066254	174	77.2	1.94492	25.4987	NIL	NIL	130	70	5.8	39	91	46	31	8	9	7	10	77	32	60	0.7	0.5	129	1.33	0.1	7.84	33	22	3	18.2	11	39.5604	2.1	0.12	0.3	0.4	0.9	299	0.11	0.11	3.36	9	1.0CM,COLLAPSING	12	71
21	MRS KAMSALA	49	F	21888651	142	52	1.4565	25.7885	NIL	NIL	120	80	5.6	50	174	38	24	11	12	12	13	70	26	63	0.5	0.7	212	0.79	0.07	8.4	31	26	4	16.8	5.9	64.881	2.2	0.16	0.4	0.5	0.87	319	0.06	0.09	7.63	17	1.1CM/COLLAPSING	20	69
22	MRS SANGITA GHOSH	36	F	3067344	156	51	1.50045	20.9566	NIL	NIL	120	70	5			39	26	7	9	8	9	49	20	60	0.6	0.7	185	0.88	0.08	7.89	28	22	5	8.8	4.5	48.8636	1.7	0.12	0.8	0.6	1.39	170				15	1.0CM/COLLAPSING	18	55
23	MR NIVETHAN D	23	M	3075160	176	62.8	1.75738	20.2738	NIL	NIL	100	70				47	29	8	9	9	10	85	28	67	0.7	0.6	181	1.3	0.16	4.89	32	31	5	20.1	9.4	53.2338	2.4	0.13	0.5	0.4	1.42	205				5	1.5CM/PARTIALLY COLLAPSING	8	88
24	MR VIJAYAKUMAR	33	M	2209389	171	81.6	1.98655	27.906	NIL	NIL	130	80	5.4	43	180	47	29	10	11	10	11	63	20	68	0.8	0.6	153	1.3	0.12	7.23	30	28	6	18.6	8.5	54.3011	1.9	0.11	0.6	0.3	1.79	242	0.11	0.07	5.65	13	1.3CM/COLLAPSING	16	72
25	MRS ANITHA MANI	31	F	3058431	169	78.2	1.93388	27.38	NIL	NIL	110	70	5.2			45	30	8	10	10	11	94	36	61	0.8	0.6	153	1.36	0.11	7.7	34	26	3	14.2	7.7	45.7746	2.3	0.12					0.16	0.08		23	1.0CM/COLLAPSING	26	73
26	MRS JOSEPHINE STELLA	55	F	2653114	153	66.7	1.70858	28.4933	NIL	NIL	120	80	6.9	40	174	42	27	8	10	8	9	72	25	64	0.8	0.6	153	1.28	0.12	6.75	30	25	4	9.7	5.5	43.299	2.2	0.11	0.5	0.4	1.37	216	0.11	0.15	4.79	18	1.3CM/COLLAPSING	21	81
27	MR SIVANESH LAKSHAPATHY	33	F	3073713	175	77	1.94704	25.1429	NIL	NIL	110	70	5.9	21	124	46	31	10	11	11	11	66	26	60	0.6	0.4	130	1.4	0.1	6.58	33	26	4	12.6	9.8	22.2222	2.4	0.12	0.6	0.5	1.26	225	0.15	0.09	4.47	10	0.9CM/COLLAPSING	13	76
28	MR SANKARAN G	83	M	782608	168	66	1.76781	23.3844	NIL	NIL	120	80				36	23	11	12	12	13	54	20	62	0.5	0.9	215	0.62	0.06	9.36	32	28	6	12.2	7.2	40.9836	2	0.11	0.5	0.6	0.91	250	0.09	0.14	6.6	23	1.2CM/COLLAPSING	26	60
29	MR RAMAKRISHNAN R	46	M	3068637	167	71.5	1.8375	25.6373	NIL	NIL	120	80	5.8	36	134	48	29	9	11	10	11	69	27	61	0.5	0.5	187	0.99	0.06	8.33	33	28	4	12.5	6.5	48	2.2	0.13	0.7	0.6	1.18	259				16	1.2CM/COLLAPSING	19	62
30	MRS KUMUDHAVALLI	28	F	2744069	172	86	2.046	29.0698	NIL	NIL	105	66				45	26	9	11	10	11	82	26	69	0.5	0.3	141	1.58	0.07	8.61	33	26	4	15.1	8.8	41.7219	2.2		0.7	0.6	1.03	284				15	1.1CM/COLLAPSING	18	72
31	MRS VIDHYA M	29	F	3056812	159	65.7	1.72312	25.9879	NIL	NIL	120	70	4.9	38	63	45	30	9	10	7	8	53	18	66	0.7	0.6	170	1.14	0.13	5.61	31	23	3	12.6	6.1	51.5873	2.6		0.6	0.5	1.34	234				8	1.0CM/COLLAPSING	11	73
32	MR SHANTHA KUMAR	47	M	21914933	163	57.7	1.62877	21.717	NIL	NIL	120	90	13.9			47	32	9	10	10	11	72	24	66	0.7	0.6	148	1.16	0.04	7.19	33	22	8	11.9	5.3	55.4622	2	0.11	0.3	0.2	1.2	247	0.07	0.11	5.1	11	1.0CM/COLLAPSING	14	63
33	MR CHANDRASEKAR	50	M	21919350	157	61	1.64971	24.7475	NIL	NIL	130	70										80	33	60							31	29	7	14.7	8.2	44.2177	1.9	0.11	0.5	0.4	1.12	166	0.07	0.08	7.28	25	1.0CM/COLLAPSING	28	71
34	MR POORNACHANDRAN	29	M	21920221	173	94	2.14707	31.4077	NIL	NIL	120	80	5.1	41	218	46	31	10	11	11	12	92	34	63	0.6	0.5	184	1.36	0.09	7.04	31	22	4	13.9	7.3	47.482	1.9	0.11	0.5	0.4	1.1	308	0.09	0.1	6.1	17	1.1CM/COLLAPSING	20	79
35	MR SATYAJIT PAUL	55	M	3087356	170	67.2	1.79322	23.2526	NIL	NIL	120	80	5.4	40	141	49	32	9	10	8	10	82	32	61	0.6	0.8	186	0.81	0.05	12.09	32	26	5	14.1	7.9		1.9	0.12	0.3	0.4	0.76	136	0.1	0.09	3.69	7	1.2CM/COLL	10	79
36	MRS SNEHA R	32	F	2999491	162	58	1.62888	22.1003	NIL	NIL	100	60				35	22	7	8	8	10	67	23	66	0.7	0.5	166	1.31	0.1	7.5	34	27	5	13	5.7	56.1538	2.2	0.14	0.5	0.6	0.83	245	0.12	0.14	4.33	9	1.0CM/COLLAPSING	12	67
37	MR PALANI K	45	M	2831999	174	114	2.3769	37.6536	NIL	NIL	110	70	5	32	145	42	28	10	11	9	10	102	38	63	0.8	0.7	136	1.22	0.1	9.64	35	29	5	16.9	8	52.6627	2.4	0.12	0.5	0.3	1.38	275	0.11	0.12	4.78	7	1.1CM/COLLAPSING	10	72
38	MR PALANI S	44	M	3077645	165	67	1.76804	24.6097	NIL	NIL	100	60	5.4	38	172	36	29	8	10	9	10	68	27	60	1	0.4	207	2.55	0.13	8.44	34	29	5	12.8	7.9	38.2812	2	0.13	0.5	0.4	1.14	243				16	1.0CM/COLLAPSING	19	74
39	MRS ELAKKIYA	29	F	3046929	157	76.8	1.85729	31.1575	NIL	NIL	110	70				39	26	8	10	9	10	82	32	61	1	0.7	161	1.29	0.12	8.67	30	27	3	12.8	6.5	49.2188	2.4	0.16	0.5	0.6	0.87	146	0.15	0.19	3.73	17	1.0CM/COLLAPSING	20	65
40	MR RAJAVELU R	28	M	3087644	175	88.3	2.08918	28.8327	NIL	NIL	120	80	5.4	39	170	48	30	8	9	9	10	84	33	61	0.8	0.5	122	1.48	0.12	6.87	32	30	3	16	10.3		2.1	0.11	0.4	0.5	0.92	201	0.1	0.09	4.7	20	1.1CM/COLL	23	79
41	MS SWARNALATHA S	36	F	2329630	157	71.2	1.78632	28.8856	NIL	NIL	130	80	5.7	42	143	38	25	8	10	9	10	54	17	68	0.8	0.6	213	1.39	0.09	5.84	31	25	4	15.8	6.5	58.8608	1.9	0.16	0.5	0.3	1.71	134	0.15	0.19	3.68	20	1.1CM/COLLAPSING	23	57
42	MRS NANDHINI	25	F	3042304	163	57.8	1.63022	21.7547	NIL	NIL	102	78	4.8			40	25	9	10	9	10	69	23	67	0.9	0.5	171	1.66	0.12	7.54	31	29	4	13.9	6.7	51.7986	2	0.15	0.4	0.5	0.79	257	0.13	0.16	3.39	20	0.8CM/COLLAPSING	23	74
43	MR SAIKUMAR K	33	M	3073768	174	78	1.95527	25.763	NIL	NIL	120	80	5.7	40	108	42	28	10	11	9	10	78	27	68	0.7	0.6	153	1.19	0.12	6.12	35	30	5	13.4	8	40.2985	2									16	1.0CM/COLLAPSING	19	74
44	MR PALLAB SINHA	35	M	3073845	175	85.5	2.05482	27.9184	NIL	NIL	110	70	5.5	41	124	47	31	12	13	12	13	104	41	61	0.9	0.7	155	1.2	0.11	8.21	34	29	5	19	9.3	51.0526	2.4	0.14	0.5	0.4	1.23	265	0.16	0.12	3.57	17	1.4CM/COLLAPSING	20	71
45	MR MAGESH M	38	M	2066286	165	80.2	1.93945	29.4582	NIL	NIL	130	90	5.6	42	164	48	32	8	9	10	11	106	40	62	0.8	0.6	152	1.29	0.1	8.72	34	28	5	15.8	9.4	40.5063	2.2	0.16	0.5	0.4	1.19	270	0.09	0.14	5.84	22	1.3CM/COLLAPSING	25	76
46	MR PONISINGH MOHAN RAM	63	M	2775231	165	82.1	1.96296	30.1561	NIL	NIL	120	70	5.6	36	103	48	31	10	11	8	10	78	33	61	0.5	0.7	139	0.79	0.07	9.03	34	26	5	13.7	7.6	44.5255	2.1	0.11	0.4	0.4	0.95	273	0.09	0.12	5.78	14	1.2CM/COLLAPSING	17	77
47	MRS TUMPA GHOSH BISWAS	36	F	3086243	154	84.8	1.93858	35.7565	NIL	NIL	120	80	5.2	42	132	44	27	8	10	8	10	75	29	62	1	0.8	190	1.29	0.11	10.08	32	29	5	14.4	8.7	39.5833	2.4	0.13	0.5	0.4	1.16	194	0.12	0.14	4.77	30	1.3CM/COLLAPSING	33	71
48	MR KANNAN K	47	M	2967524	178	103.6	2.28457	32.6979	NIL	NIL	120	70	5.8	32	134	45	29	8	10	10	11	87	28	68	0.6	0.8	116	0.63	0.08	8.56	32	28	4	17.2	8.8	48.8372	2.3	0.11	0.6	0.5	1.13	184	0.13	0.14	4.92	17	1.2CM/COLLAPSING	20	69
49	MRS PIYALI ROY	33	F	3081645	152	46	1.40734	19.91	NIL	NIL	130	90	5.7	40	130	47	32	8	9	8	9	101	39	61	0.9	0.7	142	1.34	0.09	10.74	29	23	5	11	6.4	41.8182	2.3	0.12	0.5	0.4	1.34	181	0.12	0.09	4.46	17	1.2CM/COLLAPSING	20	64
50	MRS RINKU SIL	41	F	3081648	151	72	1.76729	31.5776	NIL	NIL	120	80	5.6	54	93	48	32	8	10	9	10	123	40	68	1.2	0.6	154	2.07	0.1	12.4	34	28	4	16	8.1	49.375	2.5	0.13	0.5	0.4	1.14	258	0.14	0.1	3.77	12	1.3CM/COLLAPSING	15	73
51	MR BALAJI DINAKARAN	44	M	3075321	180	71.3	1.8939	22.0062	NIL	NIL	120	80	5.3	44	92	48	32	10	11	7	10	77	25	67	0.4	0.5	110	0.82	0.08	6.2	32	30	4	15.4	7.4	51.9481	2	0.14	0.5	0.5	1.1	271	0.15	0.13	3.94	8	1.0CM/COLLAPSING	11	83
52	MRS RUBY PRASAD	56	F	3070022	156	57.8	1.60027	23.7508	NIL	NIL	100	60				44	28	11	12	10	11	52	17	67	0.7	0.4	140	1.43	0.047	10.03	30	25	5	11.7	6.7	42.735	2.1	0.13	0.4	0.3	1.35	222	0.09	0.14	5.29	21	1.2CM/COLLAPSING	24	64
53	MR ANUPAM BISWAS	50	M	3079717	153	53.1	1.51942	22.6836	NIL	NIL	130	90	5.2	36	105	43	29	11	12	12	13	62	24	61	0.7	0.5	132	1.58	0.08	9.56	29	22	4	14.1	8.1	42.5532	2.2	0.12	0.5	0.4	1.25	155	0.09	0.08	5.38	27	0.9CM/COLLAPSING	30	55
54	MRS ARPITA DAS	37	F	3085358	159	51.5	1.52019	20.371	NIL	NIL	120	70	5	54	93	45	28	8	10	9	10	85	33	61	0.8	0.6	154	1.37	0.09	9.5	33	25	5	16.1	6.5	59.6273	2.5	0.12	0.5	0.3	1.55	185	0.080.10	0.08	7.025.73	18	1.2CM/COLLAPSING	21	83
55	MR SENTHILRAJ BOSE B	48	M	3082558	170	73.2	1.8739	25.3287	NIL	NIL	140	90	5.7	40	168	35	24	8	10	8	10	75	25	66	0.6	0.6	117	0.97	0.09	7.77	31	28	5	13.7	8.3	39.4161	1.9	0.1	0.6	0.3	1.81	242	0.12	0.1	5.01	14	1.4CM/COLLAPSING	17	71
56	MR ARUMUGAM K	47	M	2811607	165	67.8	1.77887	24.9036	NIL	NIL	110	70	5.6	30	244	43	29	12	13	11	12	80	32	60	0.7	0.5	150	1.54	0.08	9.24	31	26	6	14.6	6.2	57.5342	2.2	0.1	0.3	0.3	1.09	166	0.11	0.09	3.41	12	1.3CM/COLLAPSING	15	83
57	MR JAYAKUMAR S	51	M	494280	170	84	2.01141	29.0657	NIL	NIL	110	70	5.5	42	97	44	30	10	11	8	10	58	21	64	0.8	0.6	110	1.39	0.1	8.54	34	27	3	17.4	10.9	37.3563	2.1	0.13	0.6	0.5	1.15	141	0.15	0.14	4.36	16	1.3CM/COLLAPSING	19	60
58	MRS SYLVIA EZHILI E	46	F	3082563	152	67.8	1.71825	29.3456	NIL	NIL	130	80	5.8	52	146	40	26	7	9	8	9	71	25	65	0.8	0.5	164	1.63	0.1	8.04	32	27	4	15.9	9.7	38.9937	2.3	0.11	0.6	0.4	1.3	199	0.13	0.14	4.55	11	1.1CM/COLLAPSING	14	80
59	MRS SIVAPRIYA	47	F	408359	163	77.8	1.89955	29.2822	NIL	NIL	120	80	5.6	58	131	48	31	7	9	8	10	85	27	68	0.7	0.4	174	1.32	0.11	6.76	30	22	2	16.3	9.5	41.7178	2.4	0.11	0.5	0.4	1.21	126	0.13	0.09	3.95	17	1.0CM/COLLAPSING	20	79
60	MR PRADEEP KUMAR L	34	M	2902902	170	90.6	2.09124	31.3495	NIL	NIL	120	80				42	27	8	10	7	9	59	18	69	0.9	0.6	150	1.46	0.12	7.72	30	24	5	14.3	6.6	53.8462	2.2	0.14	0.6	0.5	1.03	242	0.16	0.13	3.9	15	1.3CM/COLLAPSING	18	60
61	MR SURESH	32	M	3080521	177	86.4	2.07587	27.5783	NIL	NIL	120	70	5.9	37	176	49	34	9	10	8	11	111	47	65	0.7	0.5	135	1.5	0.09	8.59	33	31	4	19.8	10.6	46.4646	2.1	0.11	0.6	0.6	0.96	246	0.13	0.09	4.87	21	1.0CM/COLLAPSING	24	73
62	MR SATHYANARAYANAN PADMANABHAN	41	M	3083455	172	70.4	1.84576	23.7966	NIL	NIL	120	70	5.4	31	181	43	29	9	10	8	10	59	18	69	0.7	0.6	118	1.26	0.09	8.15	31	24	3	12.3	5.9	52.0325	2	0.11	0.5	0.4	1.19	260	0.11	0.11	4.77	22	1.3CM/COLLAPSING	25	61
63	MR PAVENTHAN M	42	M	3083456	179	80.3	2.00862	25.0616	NIL	NIL	120	70	5.8	36	114	45	30	8	11	9	10	67	25	63	0.8	0.7	159	1.15	0.1	8.84	31	29	4	12	5.9	50.8333	2	0.11	0.6	0.4	1.21	193	0.13	0.09	4.71	22	1.2CM/COLLAPSING	25	64
64	MR SEKAR P	38	M	3081867	170	77.3	1.92719	26.7474	NIL	NIL	110	70	5.3	35	125	46	29	8	9	9	10	97	31	66	0.9	0.6	167	1.35	0.12	7.58	30	26	4	16.8	9.8	41.6667	2.1	0.12	0.5	0.6	0.81	269	0.13	0.1	4.3	16	1.2CM/COLLAPSING	19	67
65	MR GOUTAM DEBNATH	56	M	3084618	164	55.2	1.59618	20.5235	NIL	NIL	110	70	5.6	38	88	45	30	10	11	11	12	92	35	62	0.6	0.4	150	1.31	0.08	8.01	31	27	3	15.2	8	47.3684	2	0.14	0.4	0.3	202	1.17	0.1	0.15	4.42	15	1.2CM,COLLAPSING	18	66
66	MRS SRIPRABHA SRINATHAN	31	F	2710871	153	46.2	1.4144	19.736	NIL	NIL	90	60	5.2	62	91	37	23	8	9	8	10	54	17	68	0.9	0.5	128	1.67	0.14	7.09	27	24	3	11.5	7.3	36.5217	2.3	0.14	0.6	0.3	1.98	283	0.17	0.12	3.64	21	1.1CM/COLLAPSING	24	74
67	MRS THILAGAM S	45	F	3077406	168	92.4	2.10198	32.7381	NIL	NIL	120	80	5.6	41	102	48	31	9	10	8	10	55	22	60	0.8	0.7	1.08	206	0.09	9.62	34	30	6	15.6	4.4	71.7949	2	0.11	0.4	0.3	1.5	257	0.1	0.13	4.49	21	1.2CM/COLLAPSING	24	84
68	MRS SUMITHRA SAHA	65	F	3077639	141	58.7	1.5456	29.5257	NIL	NIL	130	80	5.6	48	112	43	27	8	11	9	10	63	19	68	0.5	0.6	146	0.86	0.07	8.4	30	25	5	12.5	7.5	40	1.9	0.11	0.4	0.5	0.68	217	0.77	0.11	5.44	21	1.2CM/COLLAPSING	21	60
69	MR LEO LAWRENCE A	49	M	3077675	170	66.8	1.78772	23.1142	NIL	NIL	130	80	5.8	42	119	44	29	9	10	8	9	86	31	63	0.8	0.6	161	1.34	0.08	9.95	30	26	6	17	9.7	42.9412	2	0.14	0.5	0.4	1.16	198	0.12	0.15	4.21	11	1.4CM/COLLAPSING	14	84
70	MR VARADHARAJAN G	47	M	2104404	170	81.8	1.98413	28.3045	NIL	NIL	100	60	5.8	30	110	42	29	10	11	10	11	74	22	66	0.7	0.6	141	1.24	0.08	9.68	33	29	5	18.3	9.9	45.9016	1.9	0.11	0.4	0.3	1.05	203	0.11	0.14	3.63	12	1.3CM/COLLAPSING	15	84
71	MR MATHIVANAN P	45	M	3086504	171	80	1.96641	27.3588	NIL	NIL	110	70	5.6	29	160	44	30	8	10	10	11	88	35	60	0.9	0.6	153	1.43	0.08	11.43	32	29	4	16.6	7.9	52.4096	2.1	0.1	0.4	0.3	1.33	137	0.11	0.12	4.29	21	1.3/COL	24	61
72	MR KIM PILHO	63	M	2935133	170	81.6	1.98163	28.2353	NIL	NIL	110	70	5.3	31	63	45	35	9	10	9	10	92	26	71	0.5	0.9	175	0.61	0.06	9.52	30	24	4	16.9	9.6	43.1953	2.2	0.15	0.4	0.3	1.26	176	0.13	0.11	3.74	6	1.3CM/COLLAPSING	9	79
73	MRS DHARSHINI JAYAKANTAN	28	F	3089322	153	57.6	1.58437	24.6059	NIL	NIL	90	60	5.3	42	102	44	30	8	10	8	10	81	24	71	0.7	0.5	145	1.32	0.12	6.54	32	27	3	12.8	7.8	39.0625	1.8	0.11	0.5	0.4	1.22	175	0.13	0.14	4.26	17	1.1CM/COLLAPSING	20	79
74	MR PARITOSH KUMAR DATTA	59	M	3089329	167	62	1.70754	22.231	NIL	NIL	120	70	5.3	39	170	42	27	11	13	11	13	74	27	64	0.4	0.6	157	0.79	0.07	7.26	30	23	4	12	3.7	69.1667	2.1	0.11	0.3	0.5	0.78	299	0.1	0.13	3.7	17	1.1CM/COLLAPSING	20	61
75	MR BASKARAN K	52	M	749677	161	57.9	1.62318	22.3371	NIL	NIL	100	70	5.4	51	119	42	28	10	11	8	11	77	27	65	0.6	0.5	181	1.25	0.1	6.95	33	27	4	17	10.7	37.0588	2.6	0.12	0.5	0.4	1.4	208	0.12	0.09	4.72	12	1.3CM/COLLAPSING	15	75
	MRS SUGANYA C	31	F	3087565	162	43	1.39642	16.3847	NIL	NIL	90	60	5.3	69	121	43	30	8	9	7	9	50	20	61	0.7	0.5	151	0.34	0.11	6.4	27	26	4	10.3	5.6	45.6311	2	0.13	0.6	0.3	1.66	199	0.14	0.1	4.37	13	1.5CM/PC	16	76
[truncated: 4 more columns]
